# Supplementary material
Source: publisher figshare collection journal article supplement (https://karger.figshare.com/ndownloader/files/8710255)

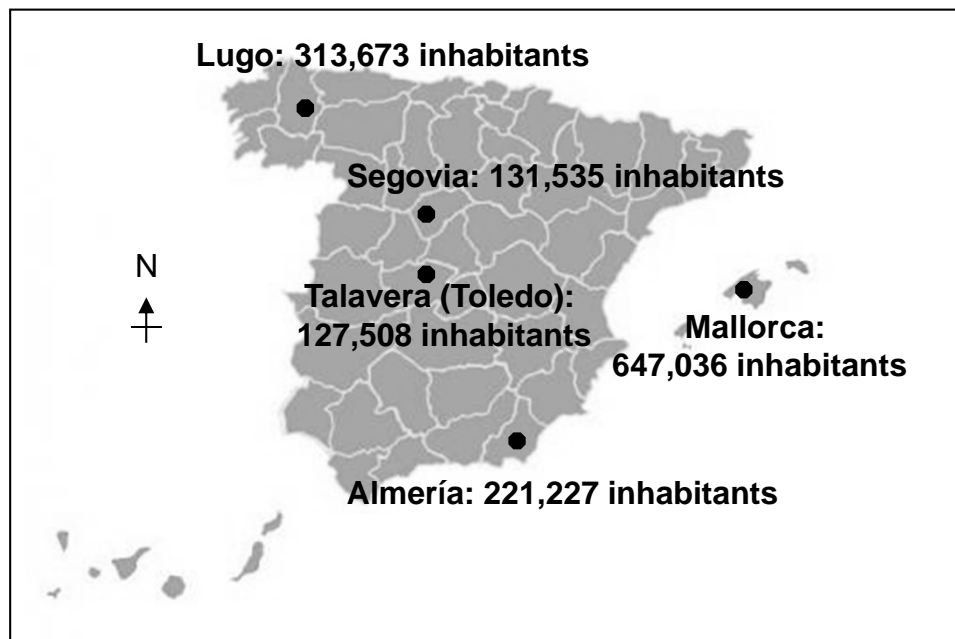

**Suppl Figure. Map of Spain showing areas and populations included in the study**

Supplement: Supplementary file 1 [file 8710255]
